# Supplementary material for: Aloe-emodin prevents nerve injury and neuroinflammation caused by ischemic stroke via the PI3K/AKT/mTOR and NF-κB pathway
Source: Royal Society of Chemistry journal article supplement (doi:10.1039/d1fo01144h), 2021-01-01

## Raw Data for

Aloe-emodin prevents nerve injury and neuroinflammation caused by ischemic stroke via PI3K/AKT/mTOR and NF- $\kappa$ B pathway

Minghua Xian<sup>†1,2,3</sup>, Jiale Cai<sup>†1,2,3</sup>, Kening Zheng<sup>1,2,3</sup>, Qu Liu<sup>1,2,3</sup>, Yali Liu<sup>1,2,3</sup>, Huiting Lin<sup>1,2,3</sup>, Shengwang Liang<sup>\*1,2,3</sup>, Shumei Wang<sup>\*2,3,4</sup>

1 School of Traditional Chinese Medicine, Guangdong Pharmaceutical University, Guangzhou 510006, China

2 Key Laboratory of Digital Quality Evaluation of Chinese Materia Medica of State Administration of TCM, Guangzhou 510006, China

3 Engineering & Technology Research Center for Chinese Materia Medica Quality of the Universities of Guangdong Province, Guangzhou 510006, China

4 School of Pharmacy, Guangdong Pharmaceutical University, Guangzhou 510006, China

† These authors contributed equally to this work.

\* Correspondence: Shumei Wang, E-mail: [gduwsm@126.com](mailto:gduwsm@126.com), Tel.:020-39352177; Shengwang Liang, E-mail: [swliang371@163.com](mailto:swliang371@163.com), Tel.:020-39352177

This WORD file includes:

Figures 2, 4, 5, and 6 show the raw data of each protein developed by western blot. The location and group of the corresponding protein are marked in the picture. (n=3 or n=4)

Fig2 A WB:PI3K-1

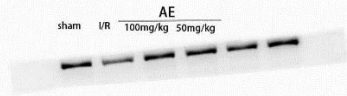

Fig2 A WB:PI3K-2

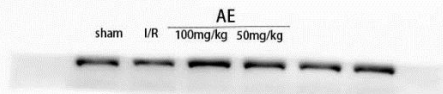

Fig2 A WB:PI3K-3

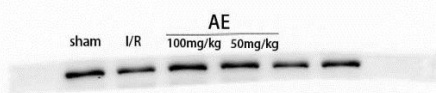

Fig2 A WB:PI3K-4

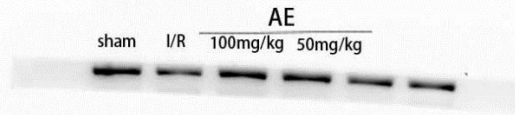

Fig2 B WB:Akt-1

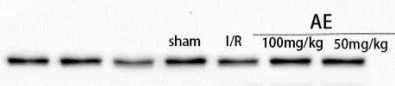

Fig2 B WB:Akt-2

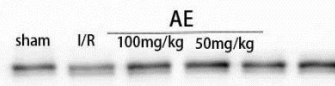

Fig2 B WB:Akt-3

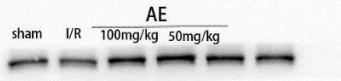

Fig2 B WB:Akt-4

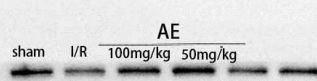

Fig2 C WB:p-Akt-1

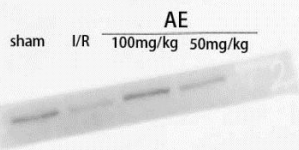

Fig2 C WB:pAkt-2

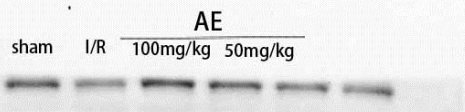

Fig2 C WB:pAkt-3

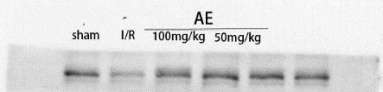

Fig2 C WB:pAkt-4

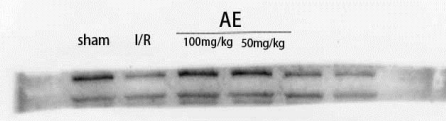

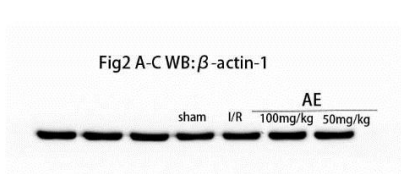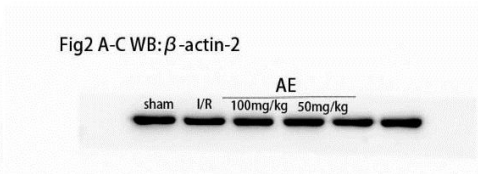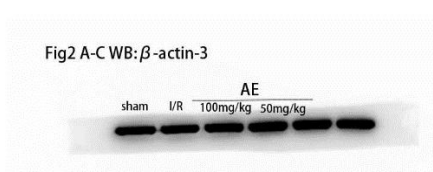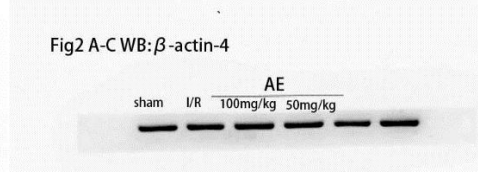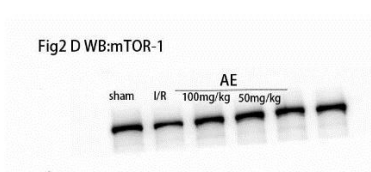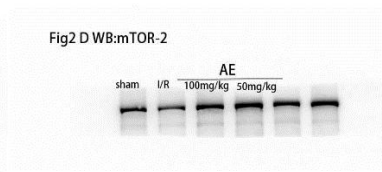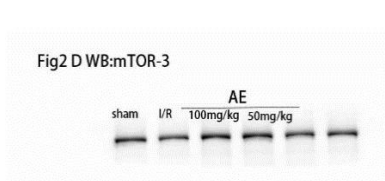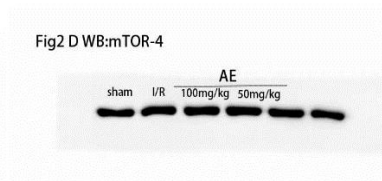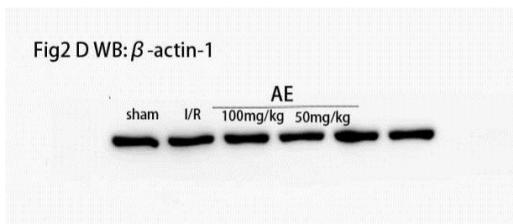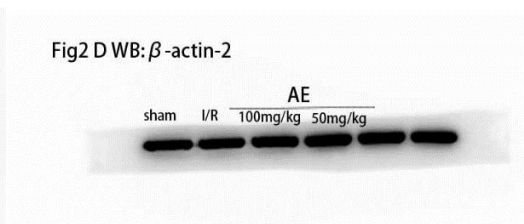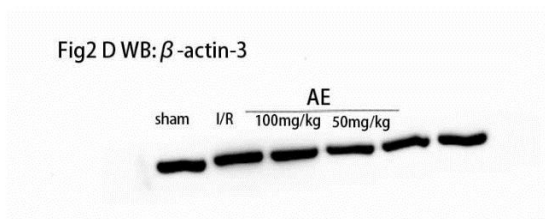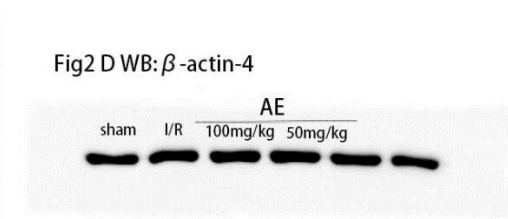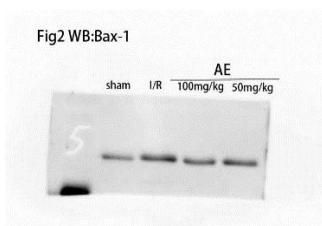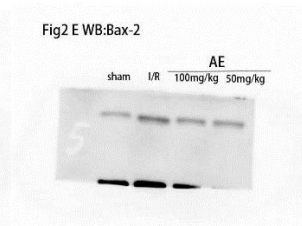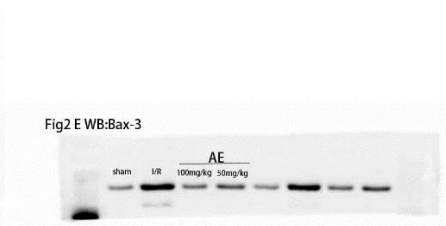

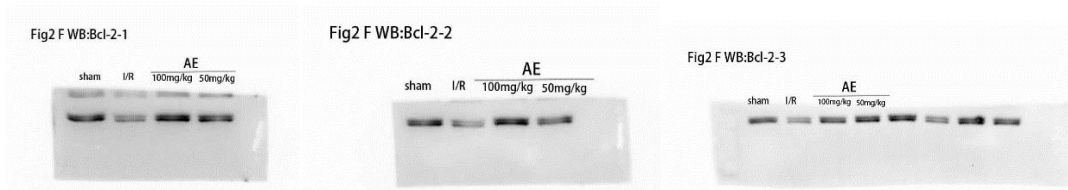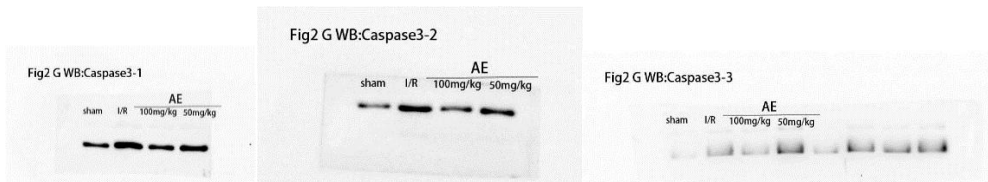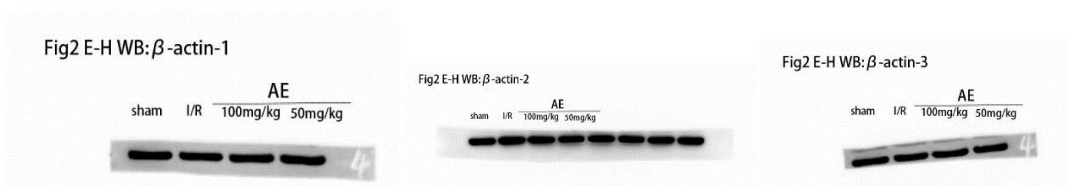

Fig4 C WB:Akt-1

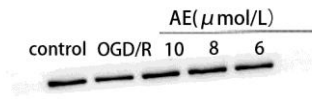

Fig4 C WB:Akt-2

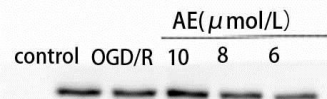

Fig4 C WB:Akt-3

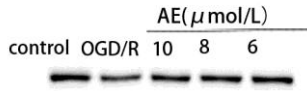

Fig4 C WB:Akt-4

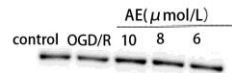

Fig4 D WB:p-Akt-1

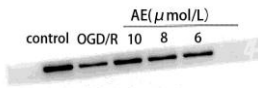

Fig4 D WB:p-Akt-2

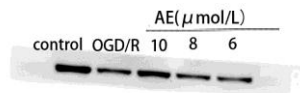

Fig4 D WB:p-Akt-3

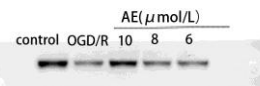

Fig4 C-D WB:β-actin-1

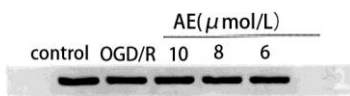

Fig4 C-D WB:β-actin-2

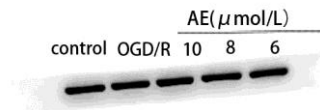

Fig4 C-D WB:β-actin-3

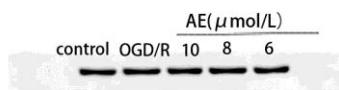

Fig4 C-D WB:β-actin-4

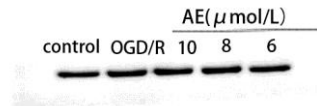

Fig4 E WB:mTOR-1

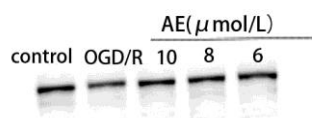

Fig4 E WB:mTOR-2

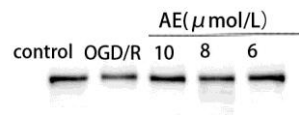

Fig4 E WB:mTOR-3

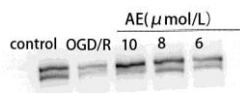

Fig4 E WB:mTOR-4

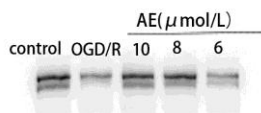



Fig4 F-H WB:  $\beta$ -actin-3

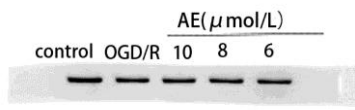

Fig4 F-H WB:  $\beta$ -actin-4

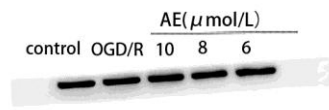

Fig5 B WB:Bax-1

|                                               |   |   |   |   |   |
|-----------------------------------------------|---|---|---|---|---|
| Na <sub>2</sub> S <sub>2</sub> O <sub>4</sub> | - | + | + | + | + |
| Aloe emodin                                   | - | - | + | - | + |
| MK-2206 2HCl                                  | - | - | - | + | + |

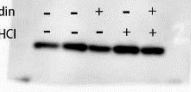

Fig5 B WB:Bax-2

|                                               |   |   |   |   |   |
|-----------------------------------------------|---|---|---|---|---|
| Na <sub>2</sub> S <sub>2</sub> O <sub>4</sub> | - | + | + | + | + |
| Aloe emodin                                   | - | - | + | - | + |
| MK-2206 2HCl                                  | - | - | - | + | + |

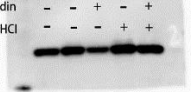

Fig5 B WB:Bax-3

|                                               |   |   |   |   |   |
|-----------------------------------------------|---|---|---|---|---|
| Na <sub>2</sub> S <sub>2</sub> O <sub>4</sub> | - | + | + | + | + |
| Aloe emodin                                   | - | - | + | - | + |
| MK-2206 2HCl                                  | - | - | - | + | + |

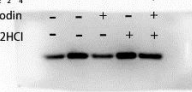

Fig5 C WB:Bcl-2-1

|                                               |   |   |   |   |   |
|-----------------------------------------------|---|---|---|---|---|
| Na <sub>2</sub> S <sub>2</sub> O <sub>4</sub> | - | + | + | + | + |
| Aloe emodin                                   | - | - | + | - | + |
| MK-2206 2HCl                                  | - | - | - | + | + |

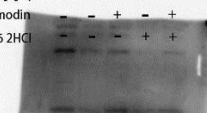

Fig5 C WB:Bcl-2-2

|                                               |   |   |   |   |   |
|-----------------------------------------------|---|---|---|---|---|
| Na <sub>2</sub> S <sub>2</sub> O <sub>4</sub> | - | + | + | + | + |
| Aloe emodin                                   | - | - | + | - | + |
| MK-2206 2HCl                                  | - | - | - | + | + |

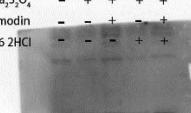

Fig5 C WB:Bcl-2-3

|                                               |   |   |   |   |   |
|-----------------------------------------------|---|---|---|---|---|
| Na <sub>2</sub> S <sub>2</sub> O <sub>4</sub> | - | + | + | + | + |
| Aloe emodin                                   | - | - | + | - | + |
| MK-2206 2HCl                                  | - | - | - | + | + |

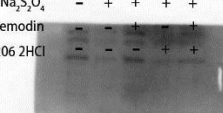

Fig5 B-C WB:β-actin-1

|                                               |   |   |   |   |   |
|-----------------------------------------------|---|---|---|---|---|
| Na <sub>2</sub> S <sub>2</sub> O <sub>4</sub> | - | + | + | + | + |
| Aloe emodin                                   | - | - | + | - | + |
| MK-2206 2HCl                                  | - | - | - | + | + |

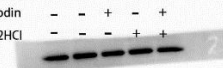

Fig5 B-C WB:β-actin-2

|                                               |   |   |   |   |   |
|-----------------------------------------------|---|---|---|---|---|
| Na <sub>2</sub> S <sub>2</sub> O <sub>4</sub> | - | + | + | + | + |
| Aloe emodin                                   | - | - | + | - | + |
| MK-2206 2HCl                                  | - | - | - | + | + |



Fig5 B-C WB:β-actin-3

|                                               |   |   |   |   |   |
|-----------------------------------------------|---|---|---|---|---|
| Na <sub>2</sub> S <sub>2</sub> O <sub>4</sub> | - | + | + | + | + |
| Aloe emodin                                   | - | - | + | - | + |
| MK-2206 2HCl                                  | - | - | - | + | + |





Fig6 C WB:NF- $\kappa$  B-1

LPS+AE( $\mu$ M)  
control LPS 8 6 4 2

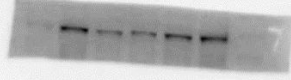

Fig6 C WB:NF- $\kappa$  B-2

LPS+AE( $\mu$ M)  
control LPS 8 6 4 2

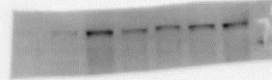

Fig6 C WB:NF- $\kappa$  B-3

LPS+AE( $\mu$ M)  
control LPS 8 6 4 2

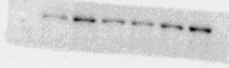

Fig6 C WB:NF- $\kappa$  B-4

LPS+AE( $\mu$ M)  
control LPS 8 6 4 2

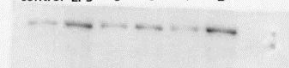

Fig6 C WB:GAPDH-1

LPS+AE( $\mu$ M)  
control LPS 8 6 4 2

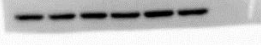

Fig6 C WB:GAPDH-2

LPS+AE( $\mu$ M)  
control LPS 8 6 4 2

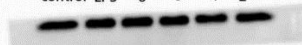

Fig6 C WB:GAPDH-3

LPS+AE( $\mu$ M)  
control LPS 8 6 4 2

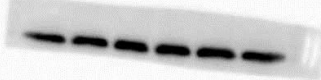

Fig6 C WB:GAPDH-4

LPS+AE( $\mu$ M)  
control LPS 8 6 4 2

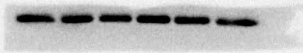

Fig6 D WB:TNF- $\alpha$ -1

LPS+AE( $\mu$ M)  
control LPS 8 6 4 2

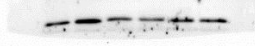

Fig6 D WB:TNF- $\alpha$ -2

LPS+AE( $\mu$ M)  
control LPS 8 6 4 2

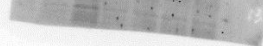

Fig6 D WB:TNF- $\alpha$ -3

LPS+AE( $\mu$ M)  
control LPS 8 6 4 2

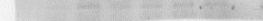

Fig6 D WB: $\beta$ -actin-1

LPS+AE( $\mu$ M)  
control LPS 8 6 4 2

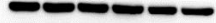

Fig6 D WB: $\beta$ -actin-2

LPS+AE( $\mu$ M)  
control LPS 8 6 4 2

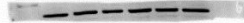

Fig6 D WB: $\beta$ -actin-3

LPS+AE( $\mu$ M)  
control LPS 8 6 4 2

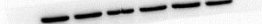

Supplement: d1fo01144h1.pdf [file d1fo01144h1.pdf]
